# Supplementary material for: Defect engineering and spilt-over hydrogen in Pt/(WO3–TH2) for selective hydrogenation of CO bonds
Source: Royal Society of Chemistry journal article supplement (doi:10.1039/d2nj02497g), 2022-01-01
Supplement: d2nj02497g1.pdf [file d2nj02497g1.pdf]

## **Defect engineering and spilt-over hydrogen in Pt/(WO<sub>3</sub>-TH<sub>2</sub>) for selective hydrogenation of C=O bond**

(Supporting Information)

Yanchun Liu,<sup>a,b,c</sup> Xinchao Wang,<sup>b,c,d</sup> Chao Zhang,<sup>\*b,c,e</sup> Qiu Xu,<sup>b,c</sup> Lingling Dang,<sup>b,c</sup> Xia Zhao,<sup>a</sup> Huaqiao Tan,<sup>\*a</sup> Yangguang Li,<sup>\*a</sup> and Fengyu Zhao<sup>\*b,c,d</sup>

<sup>a</sup> Key laboratory Key Laboratory of Polyoxometalate and Reticular Material Chemistry of Ministry of Education, Faculty of Chemistry, Northeast Normal University, Changchun 130024, PR China.

<sup>b</sup> State Key Laboratory of Electroanalytical Chemistry, Changchun Institute of Applied Chemistry, Chinese Academy of Sciences, Changchun 130022, PR China.

<sup>c</sup> Jilin Province Key Laboratory of Green Chemistry and Process, Changchun Institute of Applied Chemistry, Chinese Academy of Sciences, Changchun 130022, PR China.

<sup>d</sup> School of Applied Chemistry and Engineering, University of Science and Technology of China, Hefei, Anhui 230026, PR China

<sup>e</sup> School of Environment, Northeast Normal University, Changchun 130117, PR China.

Corresponding author, Tel: +86-431-85262410; Fax: +86-431-85262410;

E-mail address: [zhangc614@nenu.edu.cn](mailto:zhangc614@nenu.edu.cn), [tanhq870@nenu.edu.cn](mailto:tanhq870@nenu.edu.cn),  
[liy658@nenu.edu.cn](mailto:liy658@nenu.edu.cn), and [zhaofy@ciac.aac.cn](mailto:zhaofy@ciac.aac.cn)

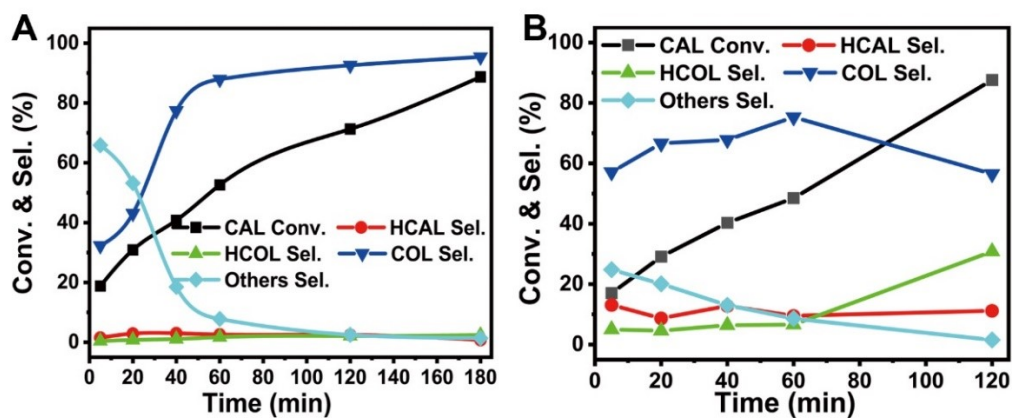

**Figure S1.** The time-conversion-selectivity curves of CAL on (A) Pt/(WO<sub>3</sub>-450H<sub>2</sub>) and (B) Pt/WO<sub>3</sub>-450H<sub>2</sub> catalysts. Reaction conditions: 3.0 mmol cinnamaldehyde, 10 mL isopropanol, 100 mg catalyst, 100 °C, 4 MPa H<sub>2</sub>.

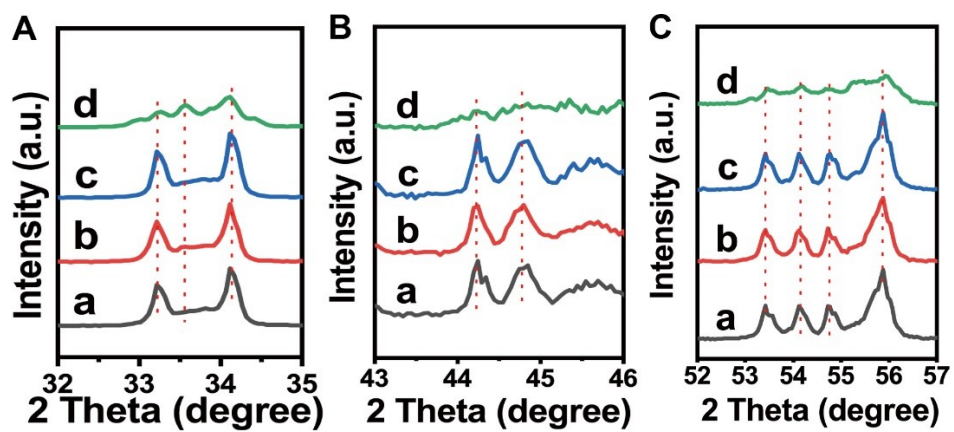

**Figure S2.** The enlarged XRD patterns of (a)  $\text{WO}_3$ , (b)  $\text{WO}_3\text{-150H}_2$ , (c)  $\text{WO}_3\text{-300H}_2$  and (d)  $\text{WO}_3\text{-450H}_2$  at different  $2\theta$  range in Figure 2A.

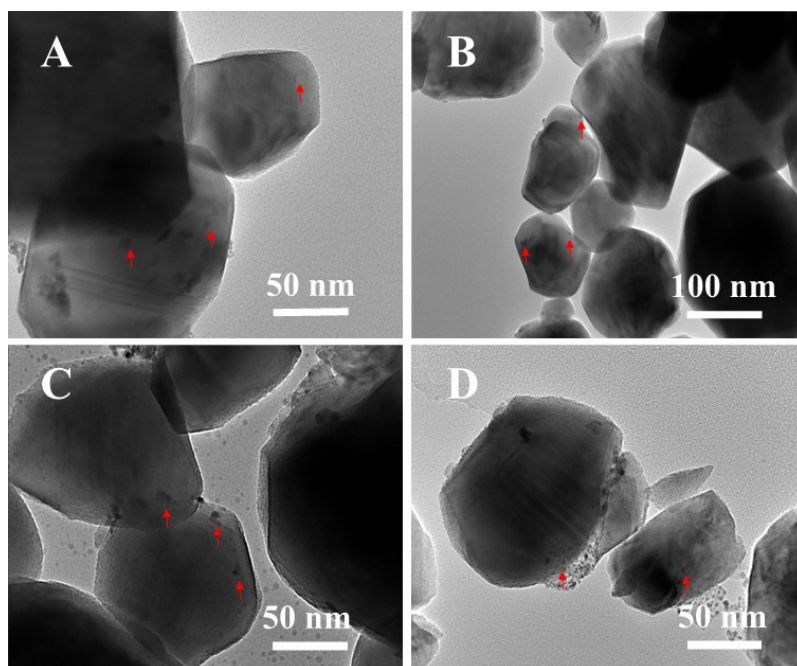

**Figure S3.** TEM images of the as prepared catalysts. (A) Pt/WO<sub>3</sub>, (B) Pt/(WO<sub>3</sub>-150H<sub>2</sub>), (C) Pt/(WO<sub>3</sub>-300H<sub>2</sub>) and (D) Pt/(WO<sub>3</sub>-450H<sub>2</sub>).

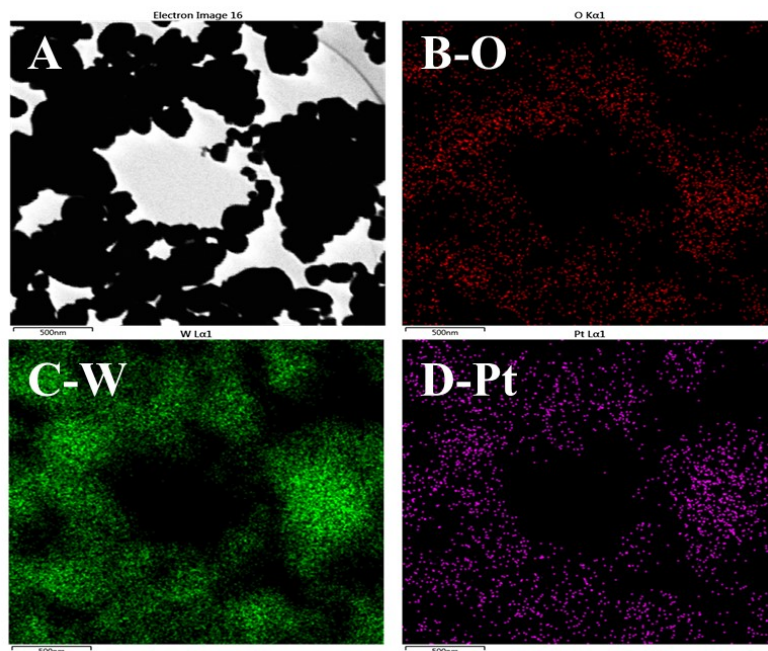

**Figure S4.** EDS mapping of corresponding elements of Pt/(WO<sub>3</sub>-300H<sub>2</sub>).

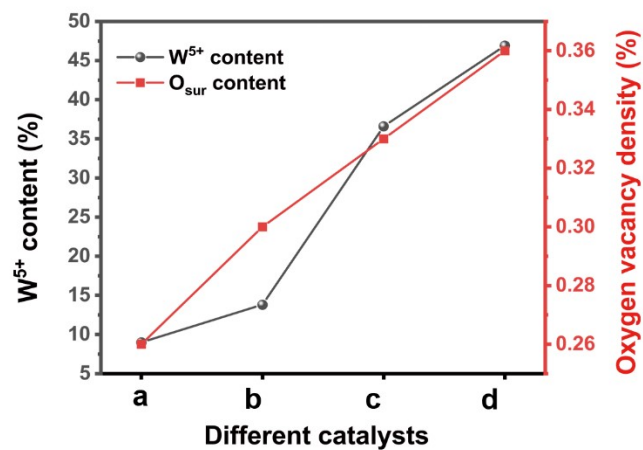

**Figure S5.** W<sup>5+</sup> content and Oxygen vacancy density on (a) Pt/WO<sub>3</sub>, (b) Pt/WO<sub>3</sub>-150H<sub>2</sub>, (c) Pt/WO<sub>3</sub>-300H<sub>2</sub> and (d) Pt/WO<sub>3</sub>-450H<sub>2</sub>, respectively.

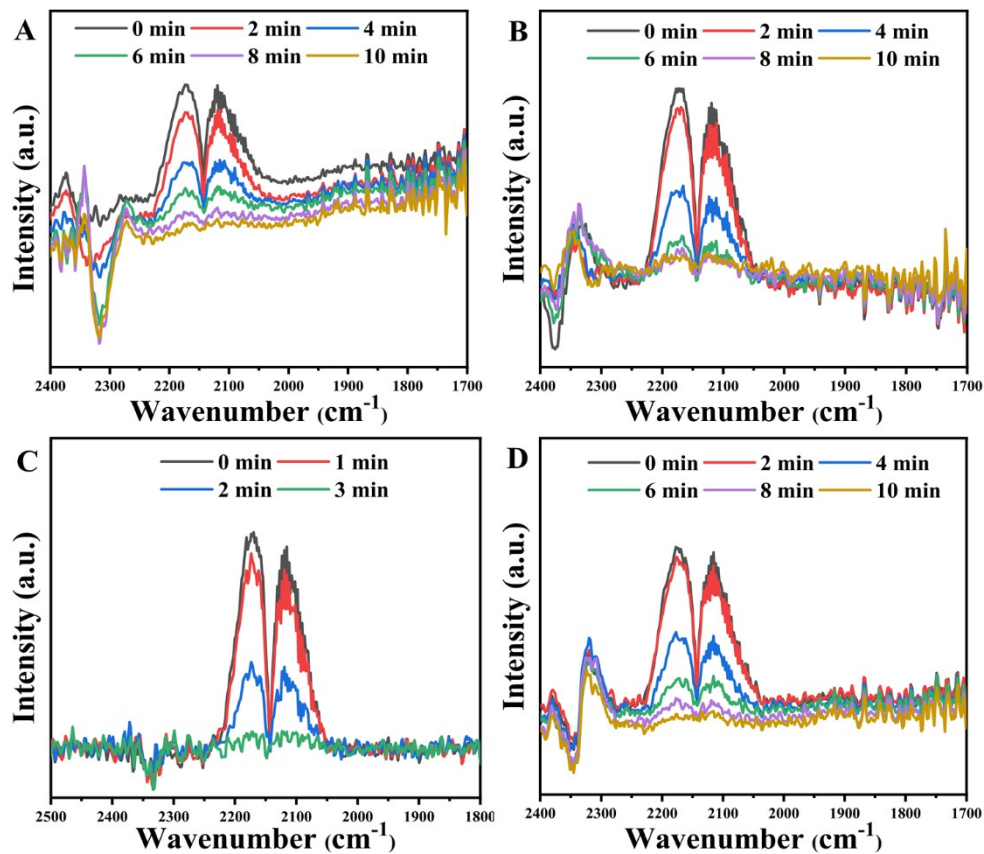

**Figure S6.** In-situ DRIFT spectra of CO molecular adsorbed on (A) Pt/WO<sub>3</sub>, (B) Pt/(WO<sub>3</sub>-150H<sub>2</sub>), (C) Pt/(WO<sub>3</sub>-300H<sub>2</sub>), (D) Pt/(WO<sub>3</sub>-450H<sub>2</sub>) catalysts after the pre-reduction treatment with H<sub>2</sub> at 150°C for 30 min.

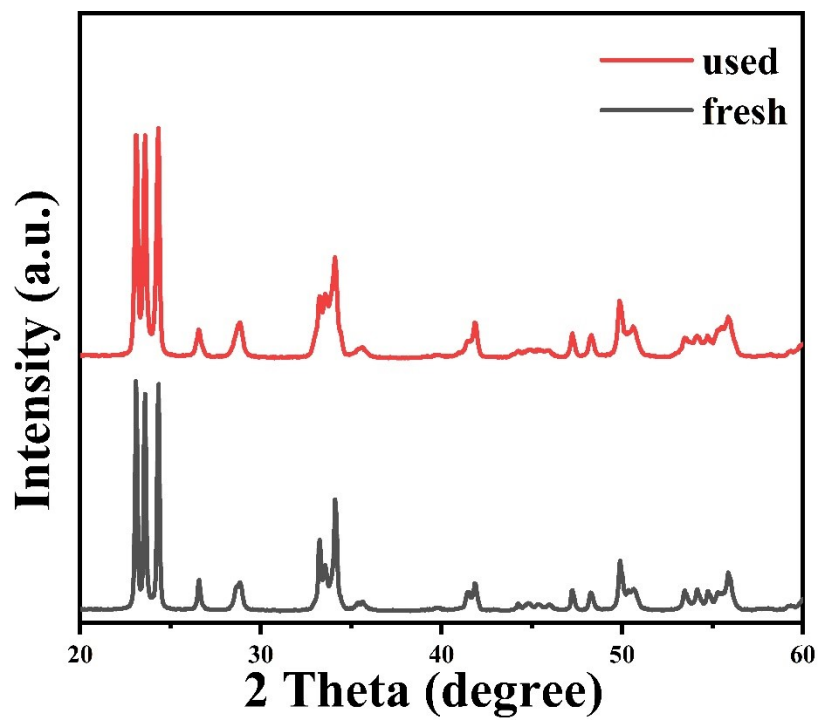

**Figure S7.** XRD patterns of Pt/(WO<sub>3</sub>-300H<sub>2</sub>): fresh catalyst (black), and used catalyst after three cycling tests (red).



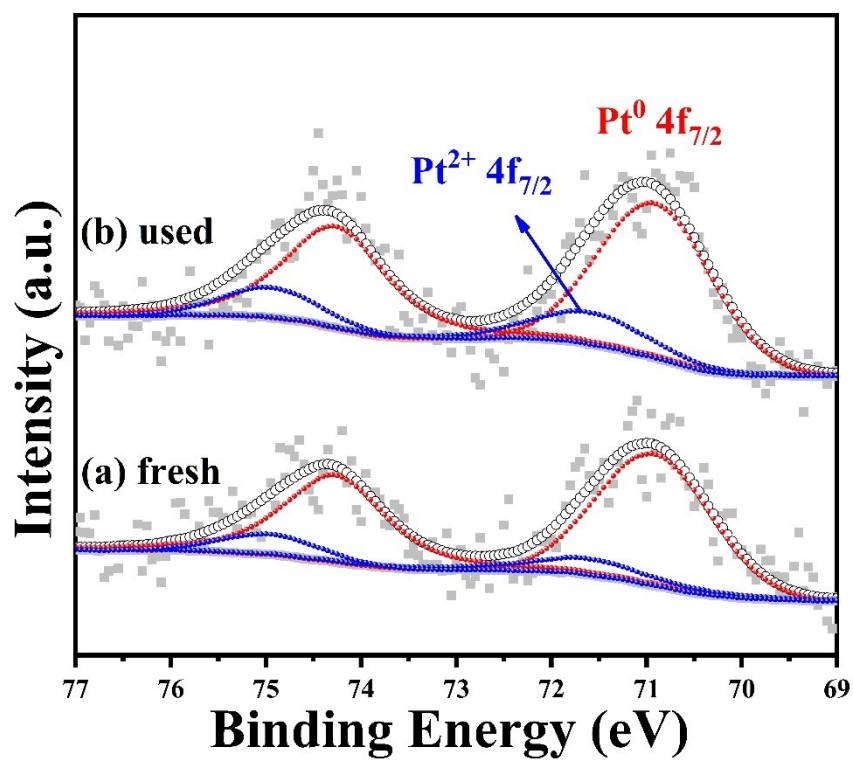

**Figure S8.** High resolution XPS spectra of Pt over the Pt/(WO<sub>3</sub>-300H<sub>2</sub>) catalyst: (a) fresh catalyst, and (b) used catalyst after three cycling tests.

**Table S1.** Degree of metal dispersion and average diameter of metal particles for the various Pt/(WO<sub>3</sub>-TH<sub>2</sub>) catalysts.

| Entry | Catalysts                                | D <sub>Pt</sub> (%) <sup>a</sup> | d <sub>Pt</sub> (nm) <sup>b</sup> | d <sub>Pt</sub> (nm) <sup>c</sup> | Loading (%) <sup>d</sup> |
|-------|------------------------------------------|----------------------------------|-----------------------------------|-----------------------------------|--------------------------|
| 1     | Pt/WO <sub>3</sub>                       | 33.45                            | 3.39                              | 4.23                              | 0.926                    |
| 2     | Pt/(WO <sub>3</sub> -150H <sub>2</sub> ) | 23.15                            | 4.89                              | 4.96                              | 1.07                     |
| 3     | Pt/(WO <sub>3</sub> -300H <sub>2</sub> ) | 29.92                            | 3.79                              | 4.11                              | 0.744                    |
| 4     | Pt/(WO <sub>3</sub> -450H <sub>2</sub> ) | 39.63                            | 2.86                              | 3.62                              | 0.823                    |

- a. Degree of Pt dispersion determined by CO pulse adsorption.
- b. Average diameter of the Pt particles determined by CO pulse adsorption.
- c. Average diameter of the Pt particles determined by TEM results.
- d. The exactly Pt loading tested by ICP.

**Table S2.** Assignment of in-situ DRIFTS absorption bands observed in **Figure 8** and **Figure 9**.

| Entry | Peak position (cm <sup>-1</sup> ) | Vibration mode                | Reference |
|-------|-----------------------------------|-------------------------------|-----------|
| 1     | 1449, 1492, 1600 cm <sup>-1</sup> | C=C stretching of phenyl ring | 1, 2      |
| 2     | 1625 cm <sup>-1</sup>             | stretching of C=C in -CH-CH-  | 1, 3, 4   |
| 3     | 1673-1681 cm <sup>-1</sup>        | stretching vibration of -C=O  | 1, 3, 4   |

#### References

1. L. J. Durdell, C. M. Parlett, N. S. Hondow, M. A. Isaacs, K. Wilson and A. F. Lee, *Sci. Rep.*, 2015, **5**, 9425.
2. M. Chen, N. Maeda, A. Baiker and J. Huang, *ACS Catal.*, 2012, **2**, 2007-2013.
3. U. Nayanathara, N. Kottegoda, I. C. Perera and T. K. Mudiyansele, *Polym. Degrad. Stab.*, 2018, **155**, 195-207.
4. Y. Tian, Y. Zhu, M. Bashari, X. Hu, X. Xu and Z. Jin, *Carbohydr. Polym.*, 2013, **91**, 586-589.
